1 **The Archaellum of *Methanospirillum hungatei* is Electrically Conductive**

2

3 David J.F. Walker<sup>1,2</sup>, Eric Martz<sup>1</sup>, Dawn E. Holmes<sup>1,3</sup>, Zimu Zhou<sup>4</sup>, Stephen S.

4 Nonnenmann<sup>2,4</sup>, Derek R. Lovley<sup>1,2\*</sup>

5

6 <sup>1</sup>Department of Microbiology, University of Massachusetts-Amherst

7 <sup>2</sup>Institute for Applied Life Sciences, University of Massachusetts-Amherst

8 <sup>3</sup>Department of Physical and Biological Science, Western New England University

9 <sup>4</sup>Department of Mechanical and Industrial Engineering, University of Massachusetts

10 Amherst

11

12 \*Corresponding author: [dlovley@microbio.umass.edu](mailto:dlovley@microbio.umass.edu)

13

14 **Here we report that the archaellum of *Methanospirillum hungatei* is electrically**  
15 **conductive. Our analysis of the previously published archaellum structure suggests**  
16 **that a core of tightly packed phenylalanines is one likely route for electron**  
17 **conductance. This is the first demonstration that electrically conductive protein**  
18 **filaments (e-PFs) have evolved in Archaea and is the first e-PF for which a structure**  
19 **is known, facilitating mechanistic evaluation of long-range electron transport in e-**  
20 **PFs.**

21

22

23 Electrically conductive pili (e-pili) expressed by microbes in the domain Bacteria  
24 play an important role in extracellular electron exchange between cells and their  
25 extracellular environment <sup>1,2</sup>. e-Pili are found in diverse bacteria <sup>1,3</sup>, but have been studied  
26 most extensively in *Geobacter sulfurreducens*, and related *Geobacter* species, in which e-  
27 pili are essential for long-range electron transport to Fe(III) oxide minerals, interspecies  
28 electron transfer, and electron conduction through biofilms <sup>1</sup>. e-Pili enable unprecedented  
29 long-range (μm) electron conduction along the length of a protein filament, which not  
30 only has important biological implications, but also suggests diverse applications for  
31 these ‘protein nanowires’ as a sustainably produced electronic material <sup>1,4-6</sup>. There is  
32 substantial debate over the potential mechanisms of long-range electron transport in e-pili  
33 <sup>1,5,6</sup>, which is unresolved in large part because of the lack of a definitive e-pili structure.  
34 Although it has been possible to determine the structure of some pili with cryo-electron  
35 microscopy (cryo-EM)<sup>7</sup>, to date, the thin diameter (3 nm) and high flexibility of *G.*  
36 *sulfurreducens* e-pili have thwarted structural determination with the cryo-EM approach.

37 The finding that e-pili have independently evolved multiple times in Bacteria <sup>3</sup>,  
38 raised the question of whether conductive protein filaments have ever evolved in  
39 Archaea. Diverse Archaea exchange electrons with their extracellular environment,  
40 reducing extracellular electron acceptors or engaging in direct interspecies electron  
41 transfer (DIET) with bacteria <sup>2,8</sup>. The alpha-helix filament structure of archaeella  
42 resembles that of type IV pili <sup>7,9,10</sup>, suggesting at least a remote possibility of producing  
43 an electrically conductive archaeellum (e-archaellum) with properties similar to e-pili.

44 We chose the methanogen *Methanospirillum hungatei* for the initial search for an  
45 e-archaellum because *M. hungatei* is capable of reducing extracellular electron acceptors

46 <sup>11</sup>; archaellum expression is readily induced in *M. hungatei* <sup>12</sup>; and a cryo-EM (3.4 Å)  
47 structure of the archaellum is available <sup>10</sup>. *M. hungatei* cells were drop-cast on highly  
48 ordered pyrolytic graphite (HOPG) and examined with conductive atomic force  
49 microscopy, in which a conductive tip serves as a translatable top electrode. Cells with a  
50 polar archaellum with the expected height of 10 nm <sup>10</sup> were readily detected with  
51 topographic imaging in contact mode (Fig. 1a,b,d). Conductive imaging demonstrated  
52 that the archaellum was electrically conductive (Fig. 1c, d, e). Point-mode current-  
53 voltage (I-V) spectroscopy revealed a linear-like response with currents that were higher  
54 than at the same voltage with *G. sulfurreducens* e-pili prepared in the same manner (Fig.  
55 1e). The pili of *G. sulfurreducens* strain Aro-5, which produces pili specifically designed  
56 for low conductivity <sup>13,14</sup>, exhibited very low currents (Figure 1e).

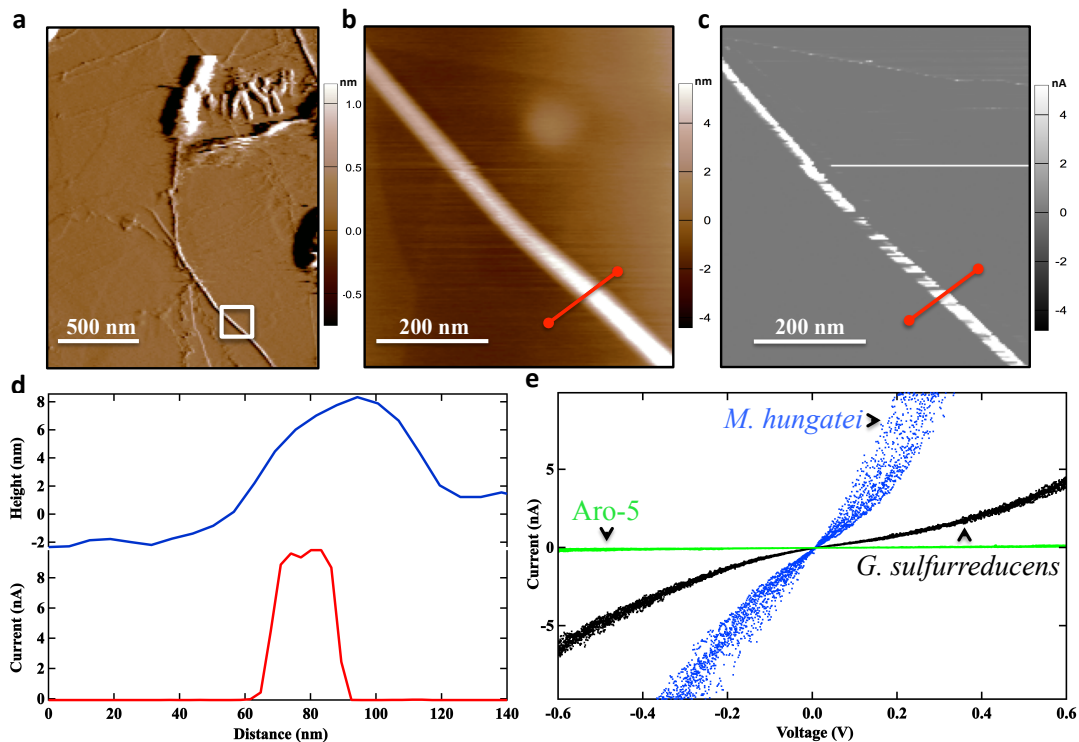

58 **Fig. 1. Electrical conductivity of the *Methanospirillum hungatei* archaellum**  
59 **determined with atomic force microscopy.** (a) Contact topographic imaging of *M.*  
60 *hungatei* showing the polar archaellum protruding from the cell. The image was collected  
61 in deflection mode. The white box designates the region chosen for additional analysis.  
62 (b) Higher resolution topographic image of the archaellum from the region designated in  
63 (a). The red line indicates the slice taken for the topographic height and current cross-  
64 sectional line profile analysis. (c) Local current image of the individual archaellum with  
65 an applied bias of 300 mV. (d) Topographic height and current response from the cross-  
66 sectional slice designated in (b). (e) Point-mode current response (I-V) spectroscopy of  
67 the individual archaellum (blue). Similar I-V analysis of the wild-type e-pili of *G.*  
68 *sulfurreducens* (black) and the poorly conductive pili of *G. sulfurreducens* strain Aro-5  
69 (green) is shown for comparison. The *M. hungatei* archaellum conductivity measurement  
70 shown is representative of multiple measurements on multiple archaella (See  
71 Supplementary Figure 1 for additional examples).

72

73 The cellular electrical contacts for extracellular electron exchange in Archaea  
74 have yet to be elucidated. The discovery of an e-archaellum expands the possibilities to  
75 be considered. For example, e-archaella offer a potential mechanism for electrons derived  
76 from external sources to transverse the S-layer to interact with intracellular electron  
77 carriers and vice versa. Unfortunately, the current lack of genetic tools for manipulating  
78 *M. hungatei* prevents further evaluation of its physiological role with approaches, such as  
79 expressing a synthetic archaellin that yields a poorly conductive filament, that have been  
80 important for demonstrating the role of e-pili in *Geobacter* species<sup>1,13</sup>.



81 The cryo-EM structure of the *M. hungatei* e-archaeellum<sup>10</sup> provides the first  
82 opportunity to directly evaluate possible routes for long-range electron transport along a  
83 biologically produced protein filament. Multiple lines of experimental evidence suggest  
84 that closely packed aromatic amino acids confer conductivity to *G. sulfurreducens* e-pili  
85<sup>1,5</sup>. Analysis of the distribution of aromatic amino acids in the *M. hungatei* e-archaeellum  
86 revealed aromatic side chains organized in three distinct groups: a core, a middle sleeve,  
87 and an outer sleeve (Fig. 2a). The aromatic rings in the middle and outer sleeves appear  
88 too widely spaced to support conductivity (Fig. 2c,d). However, phenylalanine rings in  
89 the core are packed almost as close as is physically possible<sup>15</sup>. The distances between  
90 ring centers of Phe1 and Phe13 are 4.5 and 5.1 Å (Fig. 2e), which is conceivably close  
91 enough for  $\pi$ - $\pi$  interactions, similar to the  $\pi$ - $\pi$  interactions proposed to be involved in  
92 electron conduction along *G. sulfurreducens* e-pili<sup>16-18</sup>.

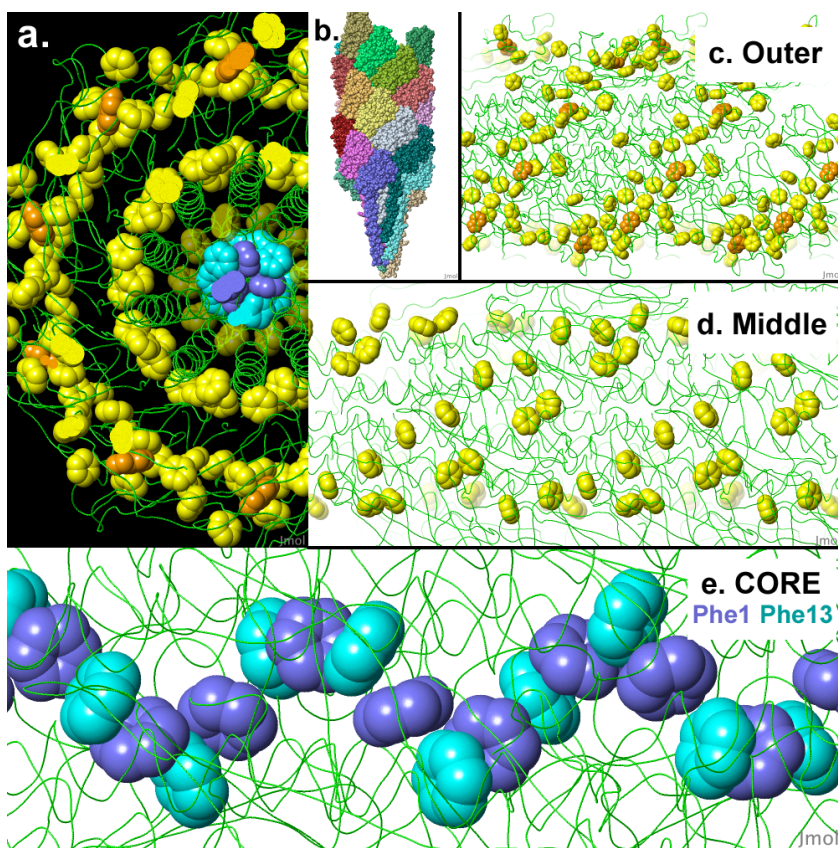

93

94 **Fig. 2. Tightly-packed aromatic rings form the core of the previously determined**  
95 **structure (PDB code 5tfy<sup>10</sup>) of the *M. hungatei* archaeellum. (a)** In cross section,  
96 aromatic rings form three well-separated groups: a core (Phe1 blue, Phe13 cyan, Phe20  
97 dim yellow), a middle sleeve, and an outer sleeve (Phe and Tyr yellow; Trp orange). **(b)**  
98 The entire model is an assembly of 26 protein chains (all atoms shown, each chain a  
99 distinct color, axis vertical). **(c)** and **(d)**, Side views (axis horizontal) of outer and middle  
100 sleeves of aromatics (rear half of model hidden). **(e)** Tightly packed core of alternating  
101 Phe1 and Phe13 rings. Ring center distances are 4.5 and 5.1 Å. Images and measurements  
102 made with Jmol.Org. See Supplementary Figure 2 for animations.

103

104 We suggest that this phenylalanine core is at least one of the features contributing  
105 to the e-archaeellum conductivity, consistent with recent experimental evidence that has  
106 suggested that phenylalanines within the hydrophobic core of an amino acid  $\alpha$ -helical  
107 structure can facilitate long-range electron transport<sup>19,20</sup>. Genetic manipulations to alter  
108 the position of phenylalanines within the *M. hungatei* archaeellum, analogous to the  
109 approach that has been used to evaluate the role of aromatic amino acid stacking in *G.*  
110 *sulfurreducens* e-pili<sup>13,14,17,18</sup>, would provide a further test of this hypothesis. The added  
111 benefit of such studies with the *M. hungatei* e-archaeellum is that it will be possible to  
112 directly examine structural modifications to electron conductance pathways with cryo-  
113 EM. In the absence of genetic tools for *M. hungatei*, it will be necessary to  
114 heterologously express the gene for the *M. hungatei* archaeellin in a genetically tractable  
115 archaeal host, similar to the expression of heterologous e-pili in *G. sulfurreducens*<sup>3</sup>, or to  
116 identify a similar e-archaeellum in a genetically tractable archaeon.

117 Microbially produced protein nanowires show substantial promise as a sustainable

118 “green” electronic material with possibilities for functionalization and biocompatibility  
119 not available with other nanowire materials<sup>1,4-6</sup>. e-Archaeella offer a unique opportunity  
120 directly examine how synthetic designs to tune conductivity and/or add functionality  
121 influences protein nanowire structure, enabling a less empirical approach to the design of  
122 protein nanowire electronics.

123 The discovery of e-archaeella indicates that a search for electrically conductive  
124 protein filaments in other Archaea as well as the Eukarya is warranted. The high  
125 energetic cost for the biosynthesis of the abundant aromatic amino acids necessary to  
126 produce conductive filaments suggests positive selection for conductivity. For microbes  
127 like *Geobacter*, the benefit in promoting extracellular electron exchange is clear. The  
128 possibility that other physiological functions, such electrical signaling between cells, may  
129 have provided an evolutionary advantage in *M. hungatei* and other organisms should be  
130 explored.

131

## 132 **Methods**

133 *M. hungatei* was grown as previously described<sup>12</sup> in low phosphate medium to induce  
134 archaeellum expression. An aliquot (100  $\mu$ l) of the culture was drop-cast onto highly  
135 oriented pyrolytic graphite (HOPG). Cells were allowed to attach to the HOPG for 10  
136 min and then the liquid was removed with a pipette tip. The surface was washed twice  
137 with 100  $\mu$ l of deionized water, the surface was blotted dry at the edge with a Kimwipe,  
138 and placed in a desiccator overnight. Samples were equilibrated with atmospheric  
139 humidity for at least two hours. Conductive atomic force microscopy was performed  
140 using an Oxford Instruments/Asylum Research Cypher ES atomic force microscope. All

141 topographic and current imaging was performed with a Pt/Ir-coated Arrow-ContPT tip  
142 with a 0.2 N/m force constant (NanoWorld AG, Neuchâtel, Switzerland). Topographic  
143 imaging required a set point of 0.002V. The conductive tip was attached to an ORCA™  
144 dual-gain transimpedance amplifier and held at ground to serve as a translatable top  
145 electrode. A 300 mV bias was applied to the HOPG and the locally detected current  
146 response of the archaeellum was identified. Point-mode current-voltage (I-V) spectroscopy  
147 was performed by applying the conducting AFM tip to the top of the archaeellum  
148 (0.002V) and performing a voltage sweep at a frequency of 0.99 Hz.

149

## 150 **References**

151

- 152 1 Lovley, D. R. Electrically conductive pili: biological function and potential  
153 applications in electronics. *Curr. Opin. Electrochem.* **4**, 190-198 (2017).
- 154 2 Lovley, D. R. Syntrophy goes electric: direct interspecies electron transfer. *Ann.*  
155 *Rev. Microbiol.* **71**, 643-664 (2017).
- 156 3 Walker, D. J. F. *et al.* Electrically conductive pili from genes of phylogenetically  
157 diverse microorganisms. *ISME J.* **12**, 48-58 (2018).
- 158 4 Lovley, D. R. e-Biologics: Fabrication of sustainable electronics with ‘green’  
159 biological materials. *mBio* **8**, e00695-00617 (2017).
- 160 5 Ing, N. L., El-Naggar, M. Y. & Hochbaum, A. I. Going the distance: long-range  
161 conductivity in protein and peptide bioelectronic materials. *J. Phys. Chem. B*,  
162 DOI: 10.1021/acs.jpcc.1028b07431 (2018).

- 163 6 Creasey, R. C. G. *et al.* Microbial nanowires –electron transport and the role of  
164 synthetic analogues *Acta Biomater.* **69**, 1-30 (2018).
- 165 7 Egelman, E. H. Cryo-EM of bacterial pili and archaeal flagellar filaments. *Curr.*  
166 *Opin. Struct. Biol.* **46**, 31-37 (2017).
- 167 8 Lovley, D. R., Holmes, D. E. & Nevin, K. P. Dissimilatory Fe(III) and Mn(IV)  
168 Reduction. *Adv. Microb. Phys.* **49**, 219-286 (2004).
- 169 9 Albers, S.-V. & Jarrell, K. F. The archaellum: an update on the unique archaeal  
170 motility structure. *Trends Microbiol.* **26**, 351-362 (2018).
- 171 10 Poweleit, N. *et al.* CryoEM structure of the *Methanospirillum hungatei*  
172 archaellum reveals structural features distinct from the bacterial flagellum and  
173 type IV pilus. *Nature Microbiol.* **2**, 16222 (2016).
- 174 11 Cervantes, F. J. *et al.* Reduction of humic substances by halorespiring, sulphate-  
175 reducing and methanogenic microorganisms. *Environ. Microbiol.* **4**, 51-57 (2002).
- 176 12 Faguy, D. M., Koval, S. F. & Jarrell, K. F. Effect of changes in mineral  
177 composition and growth temperature on filament length and flagellation in the  
178 Archaeon *Methanospirillum hungatei*. *Arch Microbiol* **159**, 512-520 (1993).
- 179 13 Vargas, M. *et al.* Aromatic amino acids required for pili conductivity and long-  
180 range extracellular electron transport in *Geobacter sulfurreducens* *mBio* **4**,  
181 e00105-13. (2013).
- 182 14 Adhikari, R. Y., Malvankar, N. S., Tuominen, M. T. & Lovley, D. R.  
183 Conductivity of individual *Geobacter* pili. *RSC Advances* **6**, 8354-8357 (2016).

- 184 15 Sinnokrot, M. O., Valeev, E. F. & Sherrill, C. D. Estimates of the ab initio limit  
185 for  $\pi$ - $\pi$  Interactions: the benzene dimer. *J. Am. Chem. Soc.* **124**, 10887-10893  
186 (2002).
- 187 16 Malvankar, N. S. *et al.* Tunable metallic-like conductivity in nanostructured  
188 biofilms comprised of microbial nanowires. *Nature Nanotechnology* **6**, 573-579  
189 (2011).
- 190 17 Malvankar, N. S., Yalcin, S. E., Tuominen, M. T. & Lovley, D. R. Visualization  
191 of charge propagation along individual pili proteins using ambient electrostatic  
192 force microscopy. *Nature Nanotechnology* **9**, 1012-1017 (2014).
- 193 18 Malvankar, N. S. *et al.* Structural basis for metallic-like conductivity in microbial  
194 nanowires. *mBio* **6**, e00084-15 (2015).
- 195 19 Nathanael, J. G. *et al.* Amide neighbouring-group effects in peptides:  
196 phenylalanine as relay amino acid in long-distance electron transfer.  
197 *ChemBiochem* **19**, 922-926 (2018).
- 198 20 Ing, N. L., Spencer, R. K., Luong, S. H., Nguyen, H. D. & Hochbaum, A. I.  
199 Electronic conductivity in biomimetic  $\alpha$  - helical peptide nanofibers and gels.  
200 *ACS Nano* **12**, 2652-2661 (2018).

201

202

### 203 **Acknowledgments**

204 We thank Trevor Woodard for growing the *Methanospirillum hungatei* cultures. This  
205 research was supported by Office of Naval Research grant N00014-16-1-2526.

206

207 **Author contributions**

208 D.J.F.W., D.E.H., and D.R.L. conceived the project, D.J.F.W. performed the atomic force  
209 microscopy measurements with assistance and guidance from Z.Z. and S.S.N. E.M.  
210 performed the analysis of the structural model. D.J.F.W. and D.R.L. wrote the initial draft  
211 of the manuscript with comments revisions contributed by all of the authors.
